# Supplementary material for: Mercury dications: linear form is more stable than aromatic ring
Source: Royal Society of Chemistry journal article supplement (doi:10.1039/b916847h), 2009-11-19
Supplement: b916847h.pdf [file b916847h.pdf]

## **Mercury dications: linear form is more stable than aromatic ring**

Tibor Höltzl,<sup>1,2</sup> Minh Tho Nguyen,<sup>2</sup> Tamás Veszprémi\*<sup>1</sup>

Supplementary Material

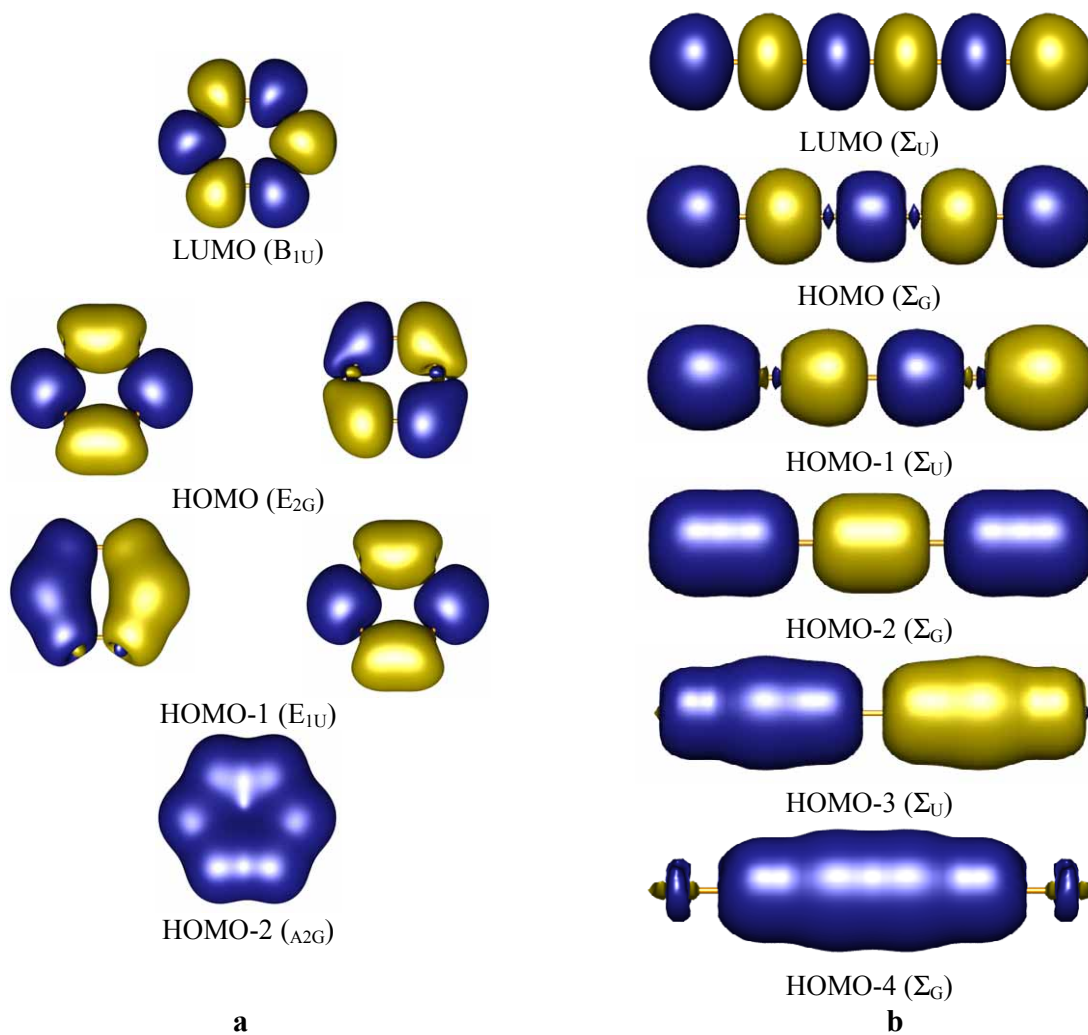

**Figure 1S** Molecular orbitals (BP86/cc-pVTZ-PP) of the **a**) cyclic and **b**) linear isomer of  $\text{Hg}_6^{2+}$ .

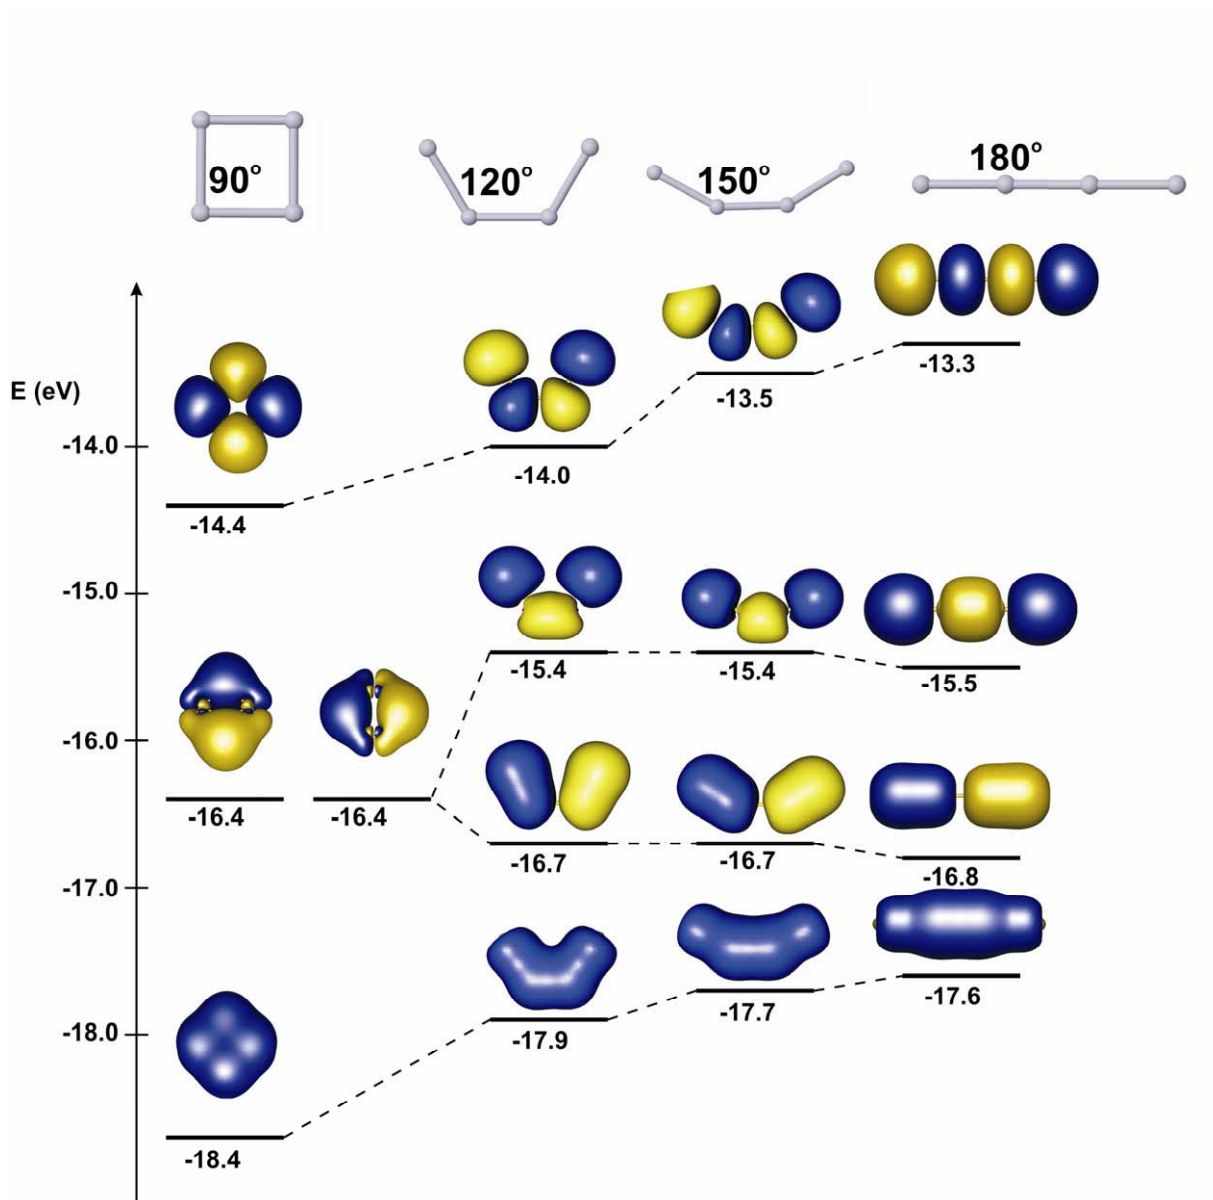

Figure 2S Orbital correlation diagram for the  $D_{4h}$ , linear and intermediate geometries of  $\text{Hg}_4^{2+}$ .

**Table 1S** Geometric parameters and relative energies of  $\text{Hg}_4^{2+}$  isomers using different methods. The cc-pVTZ-PP basis set was applied in all cases.

| Method                    | BP86              |                 | QCISD  |                 | QCISD(T) |                 |
|---------------------------|-------------------|-----------------|--------|-----------------|----------|-----------------|
| Isomer                    | linear            | D <sub>4h</sub> | linear | D <sub>4h</sub> | linear   | D <sub>4h</sub> |
| Bond                      | Bond lengths in Å |                 |        |                 |          |                 |
| 1                         | 2.736             | 2.924           | 2.700  | 2.880           | 2.696    | 2.874           |
| 2                         | 2.692             | 2.924           | 2.636  | 2.880           | 2.639    | 2.874           |
| 3                         | 2.736             | 2.924           | 2.700  | 2.880           | 2.696    | 2.874           |
| 4                         | -                 | 2.924           | -      | 2.880           | -        | 2.874           |
| E <sub>rel</sub> (kJ/mol) | 0                 | 112             | 0      | 124             | 0        | 111             |
| NICS (ppm)                | -                 | -14.1           | -      | -               | -        | -               |
| NICS <sub>zz</sub> (ppm)  | -                 | -10.7           | -      | -               | -        | -               |

**Table 2S** Geometric parameters and relative energies of  $\text{Hg}_6^{2+}$  isomers using different methods. The cc-pVTZ-PP basis set was applied in all cases.

| Method                    | BP86              |                 | QCISD  |                 |
|---------------------------|-------------------|-----------------|--------|-----------------|
| Isomer                    | linear            | D <sub>6h</sub> | linear | D <sub>6h</sub> |
| Bond                      | Bond lengths in Å |                 |        |                 |
| 1                         | 2.820             | 2.876           | 2.811  | 2.834           |
| 2                         | 2.744             | 2.876           | 2.688  | 2.834           |
| 3                         | 2.726             | 2.876           | 2.658  | 2.834           |
| 4                         | 2.744             | 2.876           | 2.688  | 2.834           |
| 5                         | 2.820             | 2.876           | 2.811  | 2.834           |
| 6                         | -                 | 2.876           | -      | 2.834           |
| E <sub>rel</sub> (kJ/mol) | 0                 | 107             | 0      | 119             |
| NICS (ppm)                | -                 | -16.4           | -      | -               |
| NICS <sub>zz</sub> (ppm)  | -                 | -34.3           | -      | -               |

**Table 3S** Relative energies of the ring isomers compared to the linear clusters using CCSD(T) method and different basis sets on QCISD(T)/cc-pVTZ-PP geometries for the  $\text{Hg}_4^{2+}$  clusters and QCISD/cc-pVTZ-PP geometries for  $\text{Hg}_6^{2+}$  clusters.

|                | $\text{Hg}_4^{2+}$ | $\text{Hg}_6^{2+}$ |
|----------------|--------------------|--------------------|
| aug-cc-pVDZ-PP | 110.3              | 102.4              |
| aug-cc-pVTZ-PP | 111.4              | 102.0              |
| aug-cc-pVQZ-PP | 110.9              | -                  |
| CBS(DTQ)       | 111.2              | -                  |

Complete basis set (CBS) value was extrapolated using the aug-cc-pVXZ-PP (X=D, T, Q) basis sets and the default extrapolation procedure of Molpro.

Ref. 9:

Gaussian 03, Revision D.02,

M. J. Frisch, G. W. Trucks, H. B. Schlegel, G. E. Scuseria,  
M. A. Robb, J. R. Cheeseman, J. A. Montgomery, Jr., T. Vreven,  
K. N. Kudin, J. C. Burant, J. M. Millam, S. S. Iyengar, J. Tomasi,  
V. Barone, B. Mennucci, M. Cossi, G. Scalmani, N. Rega,  
G. A. Petersson, H. Nakatsuji, M. Hada, M. Ehara, K. Toyota,  
R. Fukuda, J. Hasegawa, M. Ishida, T. Nakajima, Y. Honda, O. Kitao,  
H. Nakai, M. Klene, X. Li, J. E. Knox, H. P. Hratchian, J. B. Cross,  
V. Bakken, C. Adamo, J. Jaramillo, R. Gomperts, R. E. Stratmann,  
O. Yazyev, A. J. Austin, R. Cammi, C. Pomelli, J. W. Ochterski,  
P. Y. Ayala, K. Morokuma, G. A. Voth, P. Salvador, J. J. Dannenberg,  
V. G. Zakrzewski, S. Dapprich, A. D. Daniels, M. C. Strain,  
O. Farkas, D. K. Malick, A. D. Rabuck, K. Raghavachari,  
J. B. Foresman, J. V. Ortiz, Q. Cui, A. G. Baboul, S. Clifford,  
J. Cioslowski, B. B. Stefanov, G. Liu, A. Liashenko, P. Piskorz,  
I. Komaromi, R. L. Martin, D. J. Fox, T. Keith, M. A. Al-Laham,  
C. Y. Peng, A. Nanayakkara, M. Challacombe, P. M. W. Gill,  
B. Johnson, W. Chen, M. W. Wong, C. Gonzalez, and J. A. Pople,  
Gaussian, Inc., Wallingford CT, 2004.

Ref. 10:

MOLPRO, version 2006.1, a package of ab initio programs, H.-J. Werner, P. J. Knowles, R. Lindh, F. R. Manby, M. Schütz, P. Celani, T. Korona, A. Mitrushenkov, G. Rauhut, T. B. Adler, R. D. Amos, A. Bernhardsson, A. Berning, D. L. Cooper, M. J. O. Deegan, A. J. Dobbyn, F. Eckert, E. Goll, C. Hampel, G. Hetzer, T. Hrenar, G. Knizia, C. Köppl, Y. Liu, A. W. Lloyd, R. A. Mata, A. J. May, S. J. McNicholas, W. Meyer, M. E. Mura, A. Nicklass, P. Palmieri, K. Pflüger, R. Pitzer, M. Reiher, U. Schumann, H. Stoll, A. J. Stone, R. Tarroni, T. Thorsteinsson, M. Wang, and A. Wolf, , see <http://www.molpro.net>.
